# Supplementary material for: Structure basis for recognition of plant Rpn10 by phytoplasma SAP05 in ubiquitin-independent protein degradation
Source: PubMed Central journal article supplement — iScience. 2024 Jan 12;27(2):108892. doi: 10.1016/j.isci.2024.108892 (PMC10844826; doi:10.1016/j.isci.2024.108892), 2024-01-12
Supplement: mmc1.pdf [file mmc1.pdf]

**iScience, Volume 27**

**Supplemental information**

**Structure basis for recognition of plant**

**Rpn10 by phytoplasma SAP05**

**in ubiquitin-independent protein degradation**

**Liyang Zhang, Yunxiang Du, Qian Qu, and Qingyun Zheng**

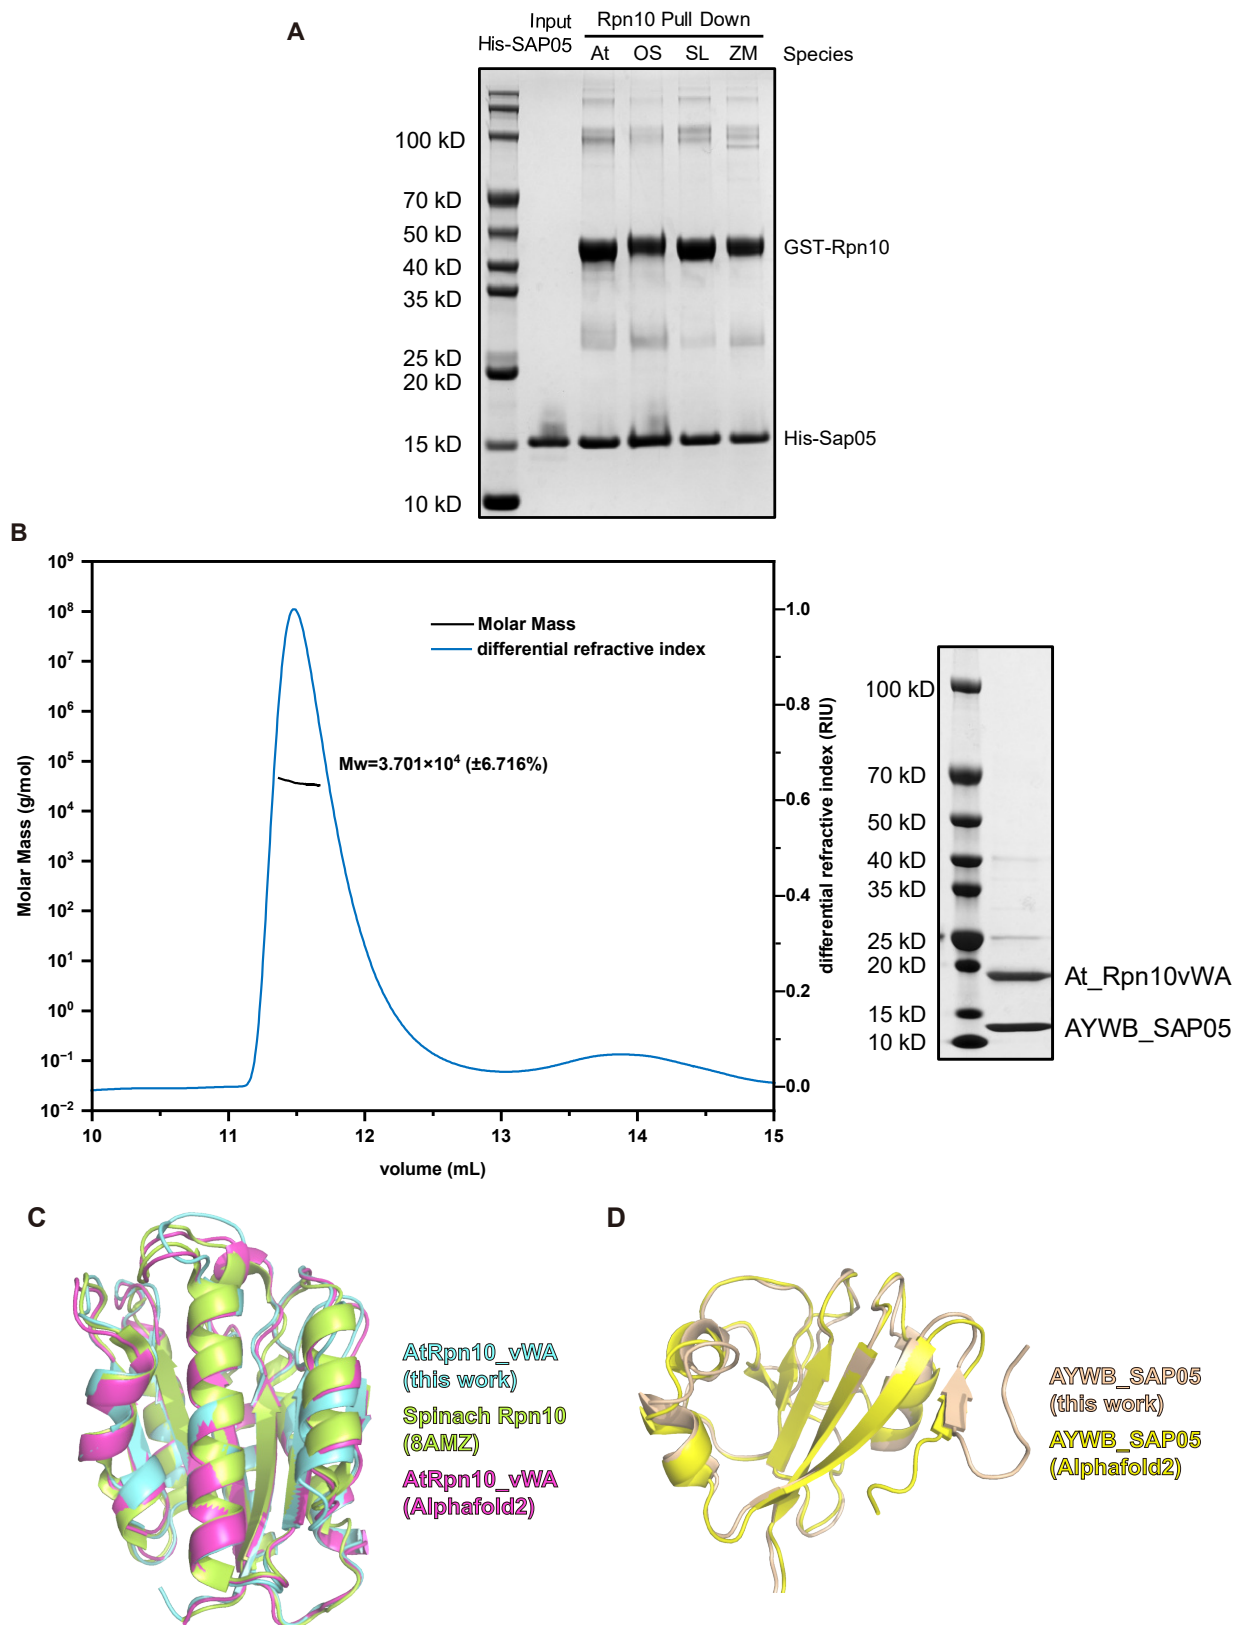

**Figure S1. Crystallization and subunit structure of AYWB\_SAP05-AtRpn10 complex, related to Figure 1 and STAR Methods.** A) Pull down assay of His6-AYWB-SAP05 with GST-Rpn10 from different plant species. B) AYWB\_SAP05 and AtRpn10\_vWA formed a stable 1:1 heterodimeric complex in size exclusion chromatography coupled with multiangle light scattering (SEC-MALS) analysis, which was analyzed by SDS-PAGE. C) Structural alignment of AtRpn10 (cyan) to hRpn10 (in 8AMZ, lime) and AlphaFold2 predicted model (magenta). D) Structural alignment of AYWB\_SAP05 (wheat) to AlphaFold2 predicted model (yellow).

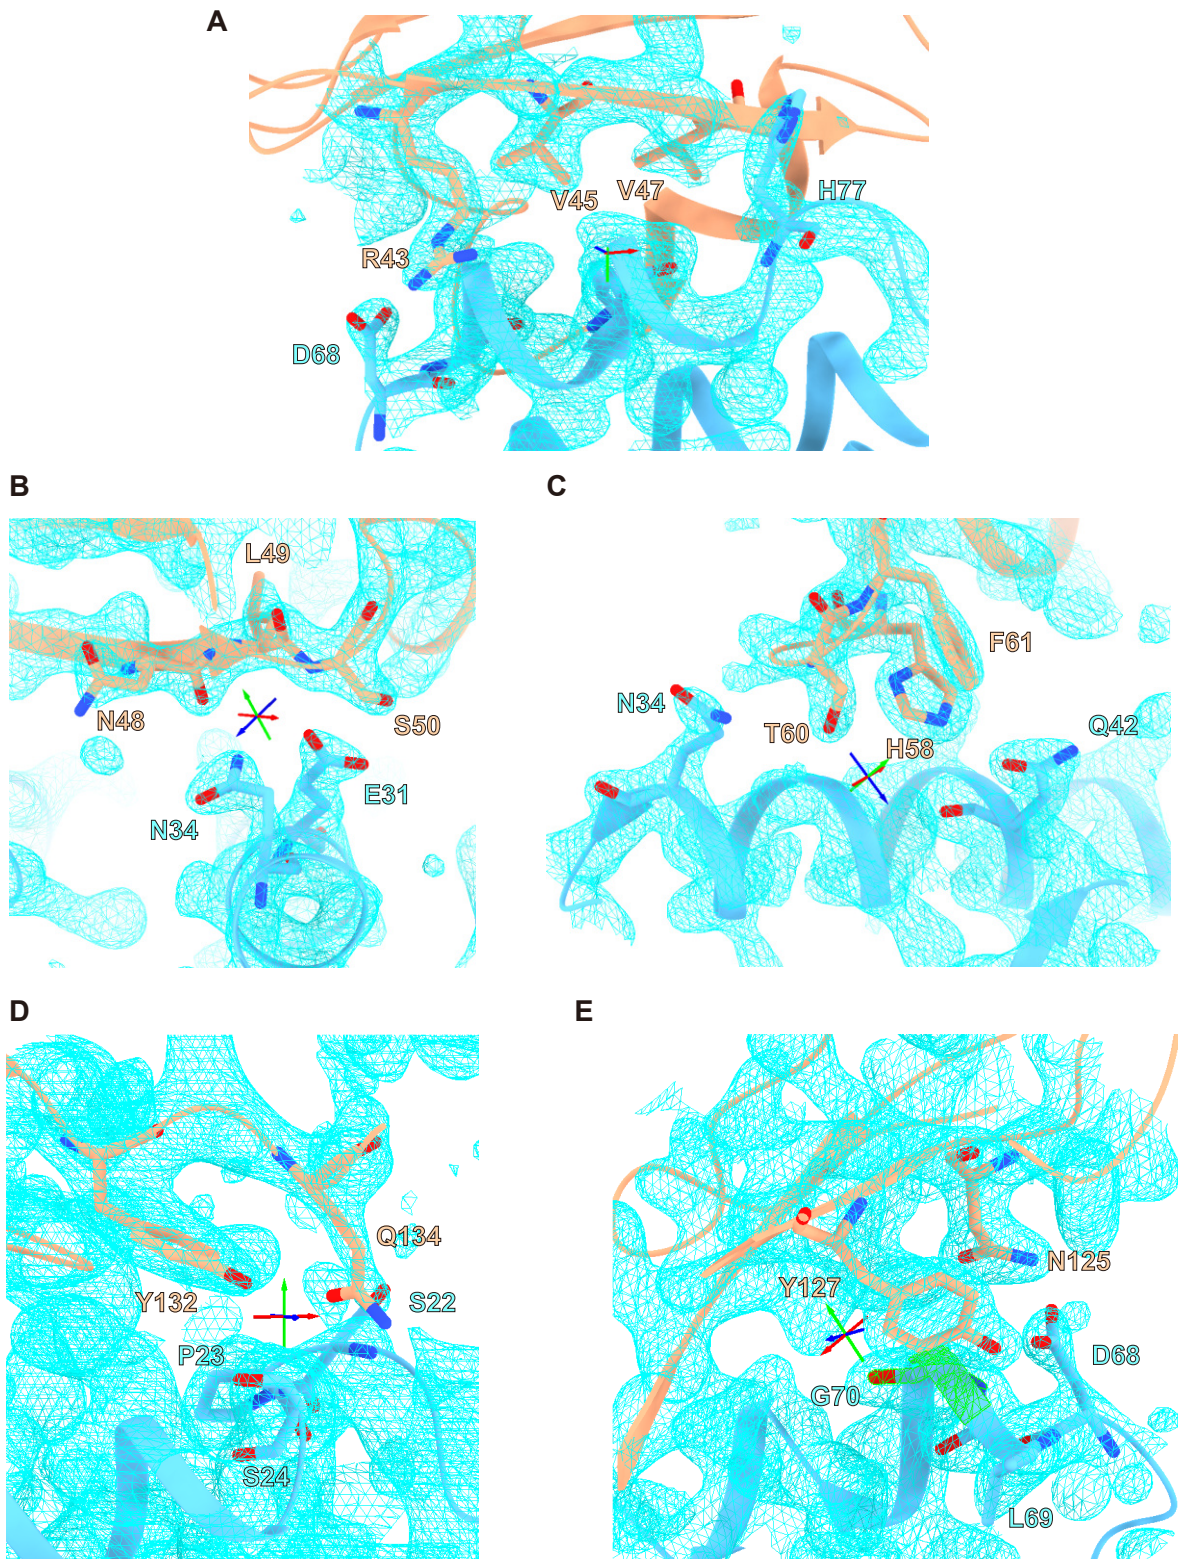

**Figure S2. Detailed interaction information in AYWB\_SAP05-AtRpn10 complex, related to Figure 2.** The residues involved in the interactions are shown in sticks, the  $2mF_o-DF_c$  crystallographic map from the .mtz file is indicated by cyan mesh. AtRpn10 is in indigo and AYWB\_SAP05 is in wheat. A) B) C) Detailed structure of  $\beta$ -side,  $\alpha$ -side, and vertex interface on V-shape peptide. D) E) Detailed structure of two anchors of C-ter peptide.

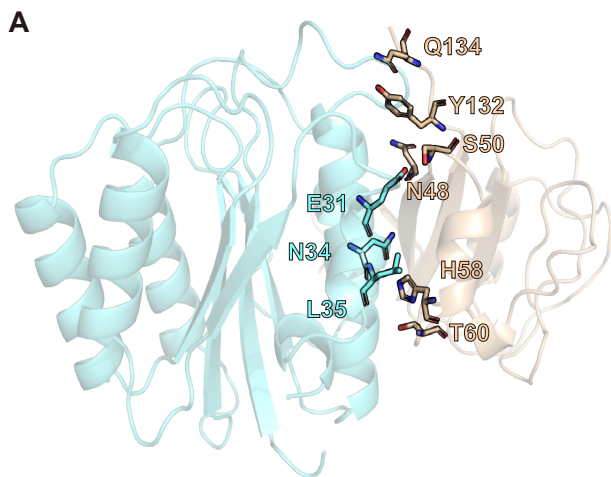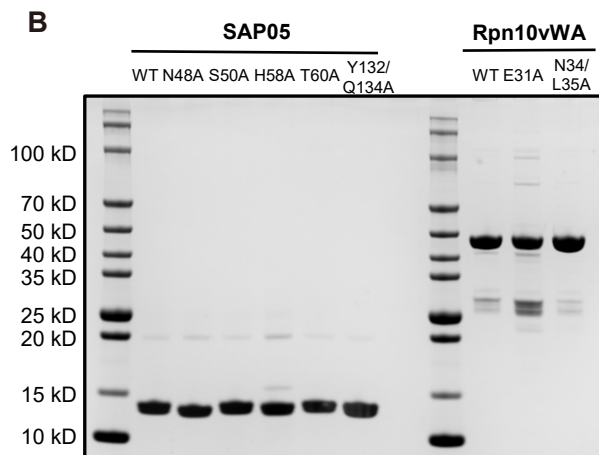

**C**

|                                                                    | $K_D$ / $\mu\text{M}$ | SE / $\mu\text{M}$ | $\text{p}K_D$ (-log $K_D$ ) |
|--------------------------------------------------------------------|-----------------------|--------------------|-----------------------------|
| <b>AYWB_SAP05 variant binding to immobilized wild type AtRpn10</b> |                       |                    |                             |
| WT                                                                 | 6.38                  | 0.26               | 5.195                       |
| N48A                                                               | 6.24                  | 0.46               | 5.205                       |
| T60A                                                               | 10.1                  | 1.1                | 4.995                       |
| Y132Q134A                                                          | 43.6                  | 2.1                | 4.360                       |
| S50A                                                               | 209                   | 36                 | 3.679                       |
| H58A                                                               | Undetectable          | Undetectable       | Undetectable                |
| <b>AtRpn10 variant binding to immobilized wild type AYWB_SAP05</b> |                       |                    |                             |
| WT                                                                 | 0.400                 | 0.039              | 6.398                       |
| N34L35A                                                            | 24.6                  | 3.3                | 4.609                       |
| E31A                                                               | Undetectable          | Undetectable       | Undetectable                |

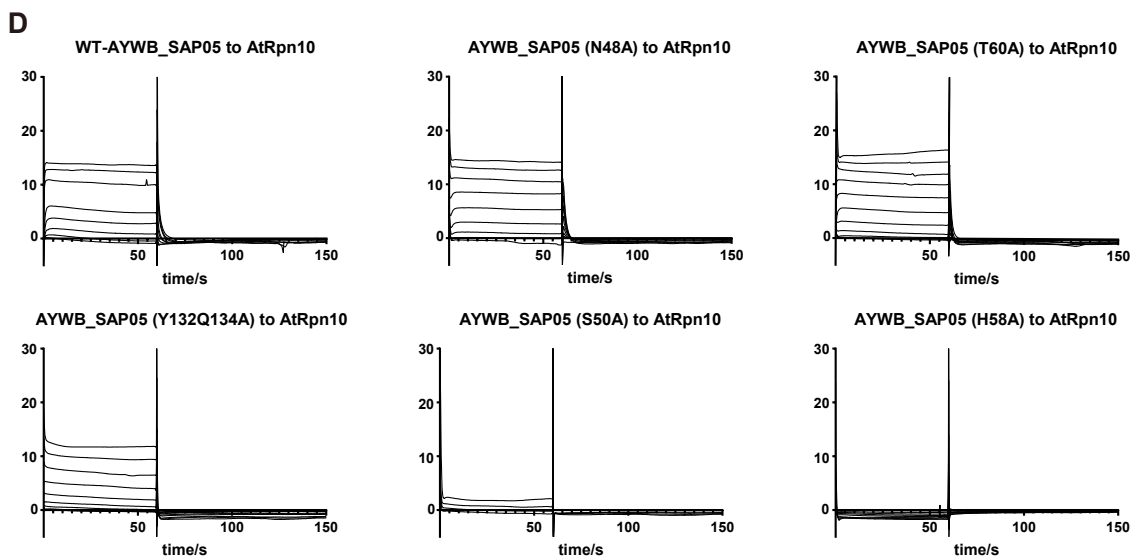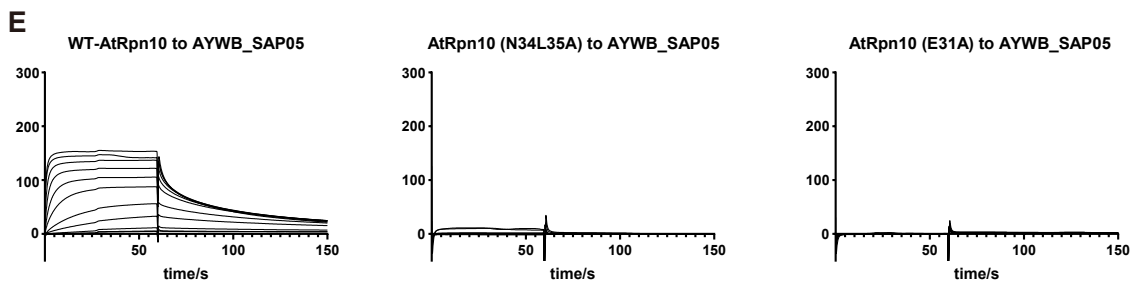

**Figure S3. Mutations of key interface residues of AYWB\_SAP05 or AtRpn10, related to Figure 3.** A) The locations of mutated key residues of AYWB\_SAP05 and AtRpn10 in the complex structure. B) SDS-PAGE analysis of wild type (WT) protein and each SAP05, Rpn10 mutants, which are the inputs of SPR assay. C) Table of dissociation constant (KD) value, standard error (SE), and pKD of each variant in SPR assay. D) SPR raw sensorgram of each AYWB\_SAP05 variant binding to AtRpn10. E) SPR raw sensorgram of each AtRpn10 variant

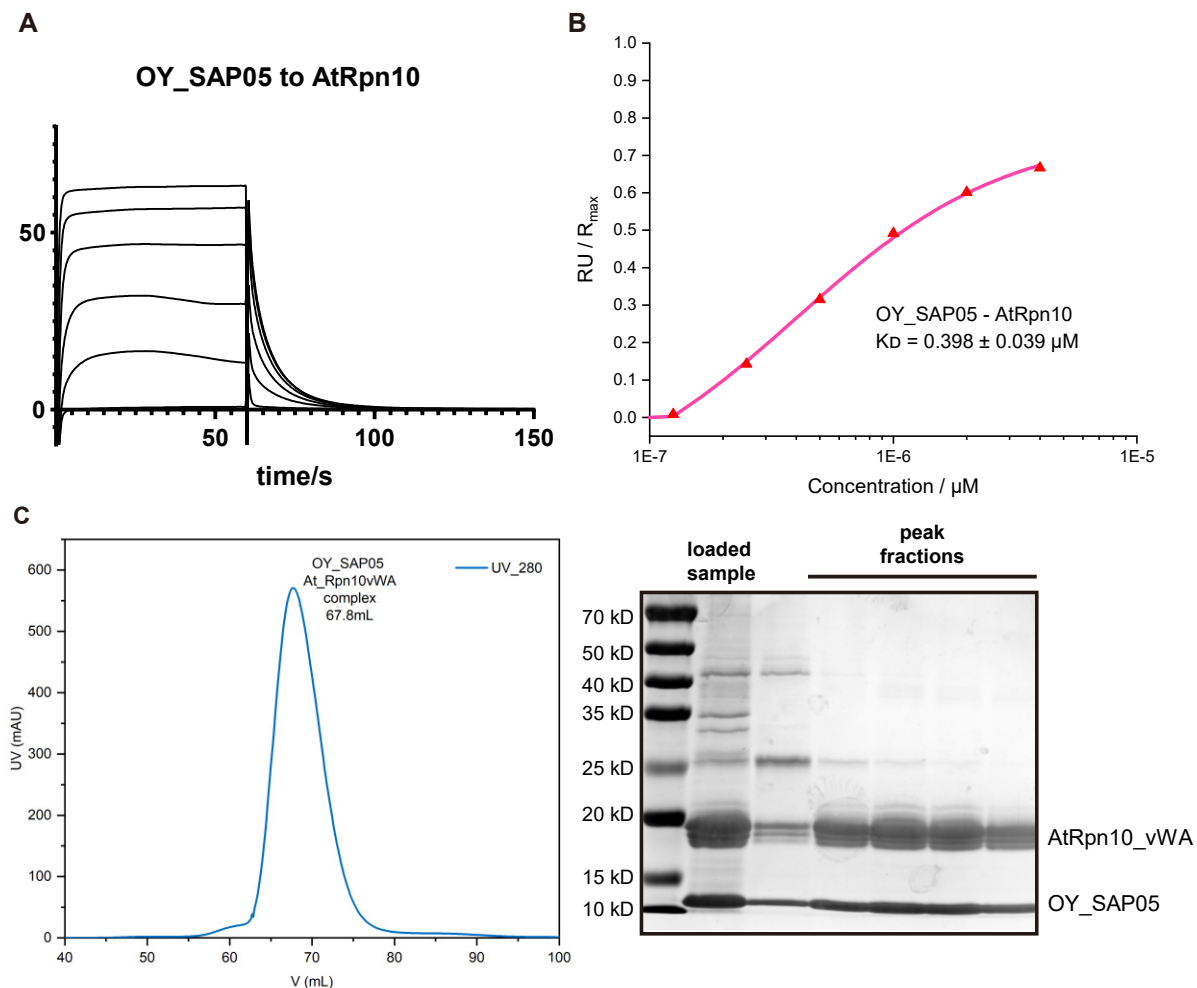

**Figure S4. Reconstitution of OY\_SAP05-AtRpn10 complex, related to Figure 4 and STAR Methods.** A) SPR raw sensorgram of WT OY\_SAP05 binding to AtRpn10. B) The curve of response value versus concentration of OY\_SAP05 in the SPR binding assay of OY\_SAP05 binding to immobilized AtRpn10. C) OY\_SAP05 and AtRpn10\_vWA formed a stable 1:1 heterodimeric complex in gel filtration, which was analyzed by SDS-PAGE.

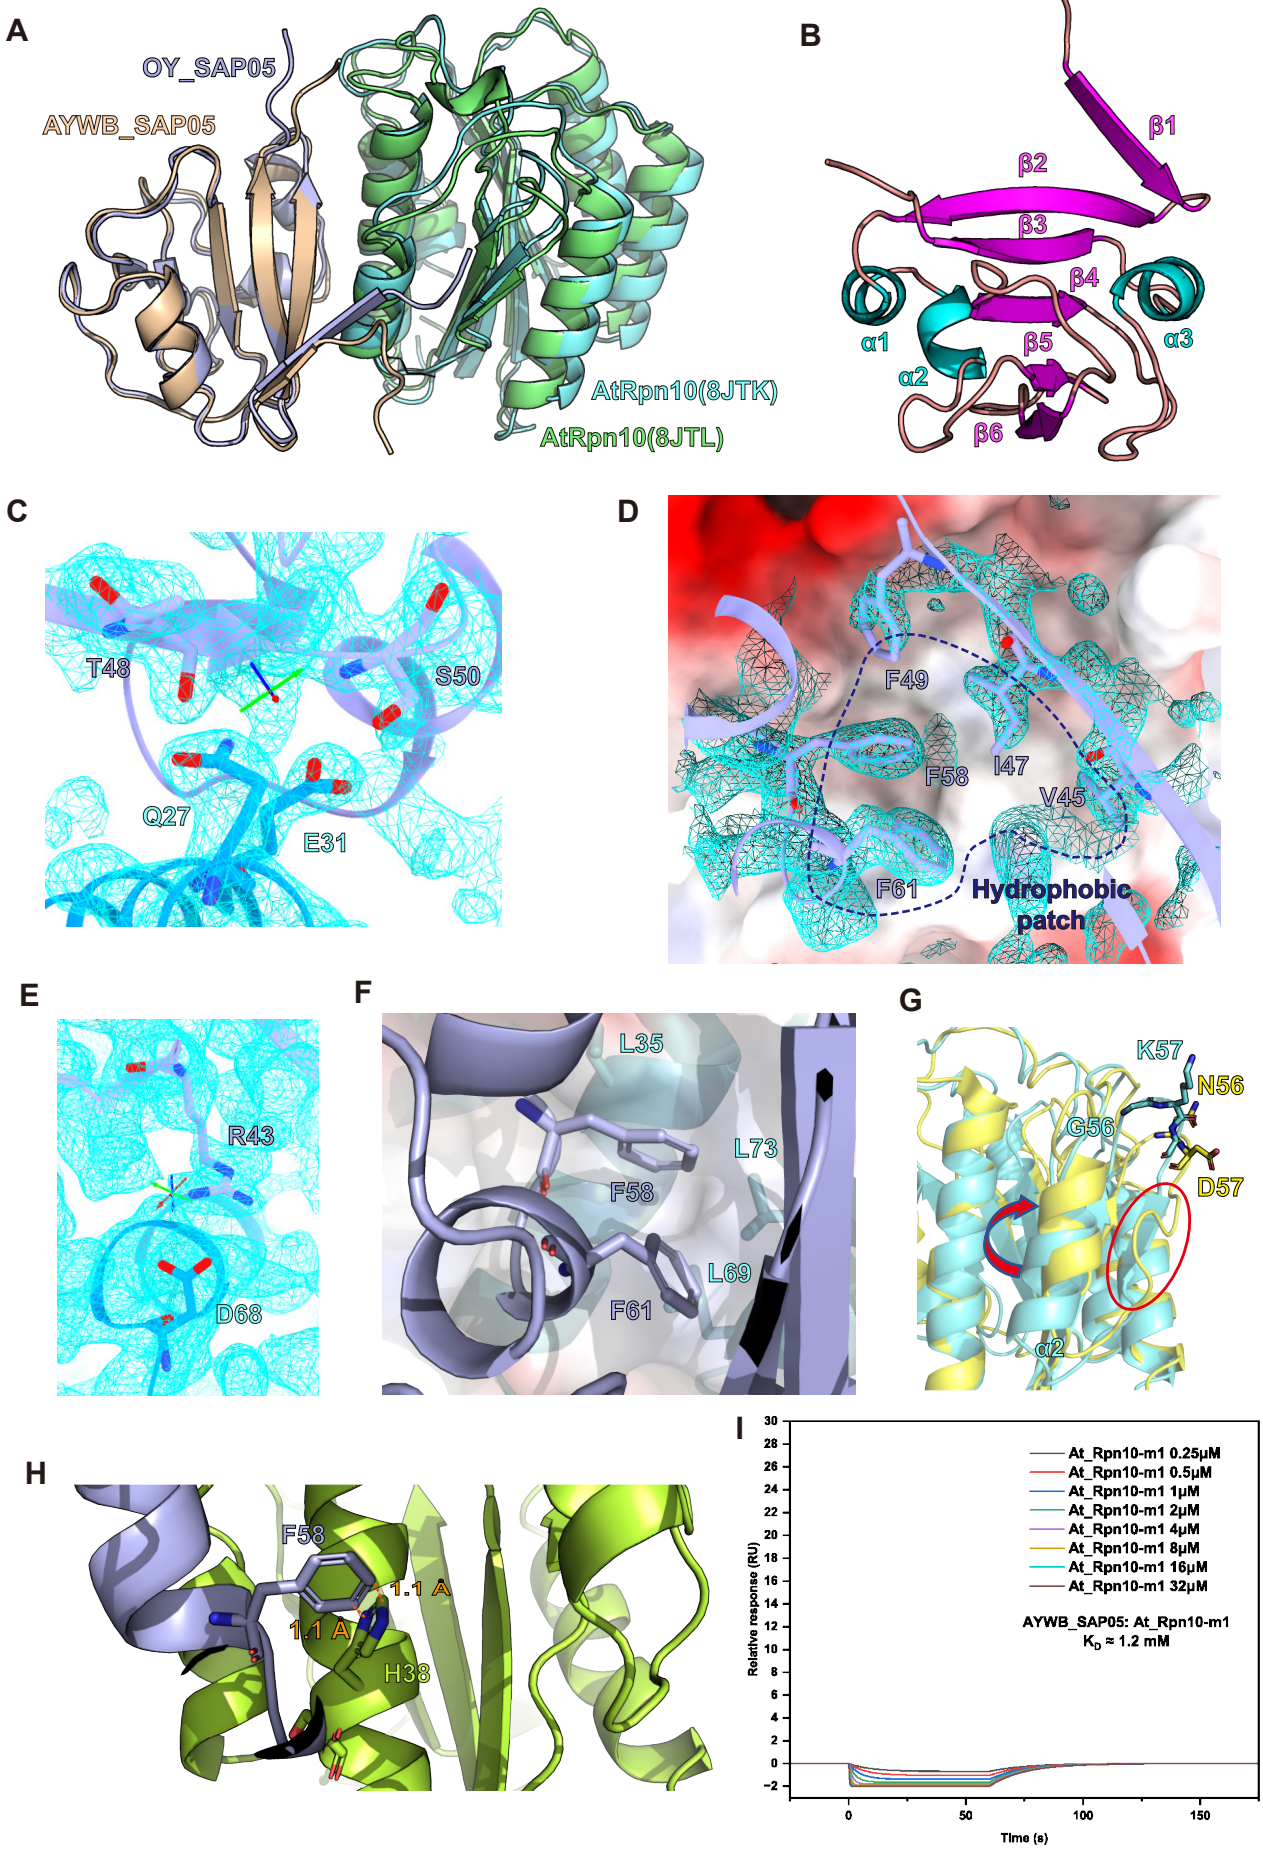

**Figure S5. Detailed structure of OY\_SAP05-AtRpn10 complex, related to Figure 4.** A) Superposing the structure of the OY\_SAP05-AtRpn10 complex (8JTL) to the AYWB\_SAP05-AtRpn10 complex (8JTK). B) Secondary structures and their number in OY\_SAP05. C) Detailed structure of hydrogen bonds formed at the vertex of OY\_SAP05 V-shape peptide. D) Residues interact with the hydrophobic patch on the AtRpn10 surface. E) New hydrogen bond formed between R43 of OY\_SAP05 and D68 of AtRpn10. F) F58 associated with F61 mediate stable hydrophobic interaction with AtRpn10 and thus cover the contribution of hydrogen bond formed by H58 of AYWB\_SAP05. G) Alignment of our crystal structure to the human Rpn10 (PSMD4 in PDB 6MSB) vWA domain structure. The key mutations were shown in sticks and the conformation differences were pointed out with the red circle and arrow. H) Docking the structures of hRpn10 to OY\_SAP05 with reference to AtRpn10\_vWA-OY\_SAP05 complex, there is a clash between H38 of hsRpn10 and F58 of OY\_SAP05. I) SPR binding assay between GST-AtRpn10\_38GA39 > HS (m1) mutant and AYWB\_SAP05.



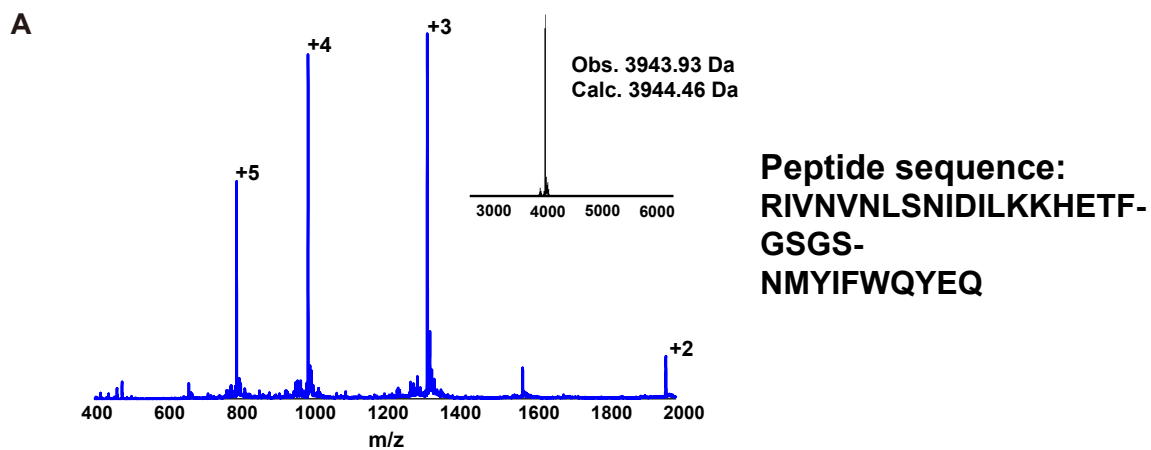

**B**

|                                                                  | $K_D / \mu\text{M}$ | SE / $\mu\text{M}$ | $\text{p}K_D (-\log K_D)$ |
|------------------------------------------------------------------|---------------------|--------------------|---------------------------|
| <b>OY_SAP05</b> variant binding to immobilized wild type AtRpn10 |                     |                    |                           |
| WT                                                               | 0.398               | 0.039              | 6.400                     |
| R43A                                                             | 2.31                | 0.46               | 5.636                     |
| T48S50A                                                          | 2.77                | 0.70               | 5.558                     |
| F58A                                                             | 34.0                | 7.9                | 4.469                     |
| F61A                                                             | 49.4                | 3.7                | 4.306                     |
| V45R                                                             | 61.2                | 8.3                | 4.213                     |
| Q59P60A                                                          | 89.1                | 7.2                | 4.050                     |

**Figure S6. AYWB\_SAP05 derived peptide and OY\_SAP05 variants binding to AtRpn10, related to Figure 4.** A) The Sequence and ESI-MS spectrum of our V-shape-C-ter peptide. B) Table of dissociation constant ( $K_D$ ) value, standard error (SE), and  $\text{p}K_D$  of each OY\_SAP05 variant in SPR assay.
